# Supplementary material for: Effect of air humidity on the removal of carbon tetrachloride from air using Cu–BTC metal–organic framework
Source: Royal Society of Chemistry journal article supplement (doi:10.1039/c1cp20168a), 2011-01-01
Supplement: c1cp20168a.pdf [file c1cp20168a.pdf]

## **Supporting information**

### **Effect of air humidity on the removal of carbon tetrachloride from air using Cu-BTC Metal-Organic Framework**

Ana Martín-Calvo<sup>1</sup>, Elena García-Pérez<sup>1</sup>, Almudena García-Sánchez<sup>2</sup>, Rocío Bueno-Pérez<sup>1</sup>, Said Hamad<sup>1</sup>, and Sofia Calero<sup>1\*</sup>

<sup>1</sup>Department of Physical, Chemical, and Natural Systems, University Pablo de Olavide,  
Ctra. Utrera km. 1. 41013 Seville, Spain.

<sup>2</sup> Process & Energy Laboratory, Delft University of Technology, Leeghwaterstraat 44, 2628CA  
Delft, The Netherlands

\*Correspondence should be addressed to S. Calero (scalero@upo.es)

**Table 1S:** Computed surface area of Cu-BTC using different types of molecules. The surface area is given in  $\text{m}^2/\text{g}$ .

| Hydrogen | Oxygen  | Nitrogen | Argon   | $\text{CCl}_4$ | Experimental <sup>1</sup> |
|----------|---------|----------|---------|----------------|---------------------------|
| 2563.92  | 2513.30 | 2344.28  | 2296.84 | 1432.47        | 1958                      |

**Table 2S:** Lennard-Jones parameters and partial charges used for Cu-BTC. The Lennard-Jones parameters were taken from the DREIDING generic force field <sup>2</sup>, except copper that was taken from the UFF force field <sup>3</sup>. The atomic charges for Cu-BTC were taken from reference <sup>4</sup>.

| Cu-BTC         |                  |                    |                           |
|----------------|------------------|--------------------|---------------------------|
| Atoms          | Charge [ $e^-$ ] | $\epsilon/k_B$ [K] | $\sigma$ [ $\text{\AA}$ ] |
| Cu             | 1.0              | 2.518              | 3.114                     |
| O <sub>b</sub> | -0.6             | 48.19              | 3.03                      |
| C <sub>a</sub> | 0.7              | 47.86              | 3.47                      |
| C <sub>b</sub> | 0.0              | 47.86              | 3.47                      |
| C <sub>c</sub> | -0.15            | 47.86              | 3.47                      |
| H              | 0.15             | 7.65               | 2.85                      |

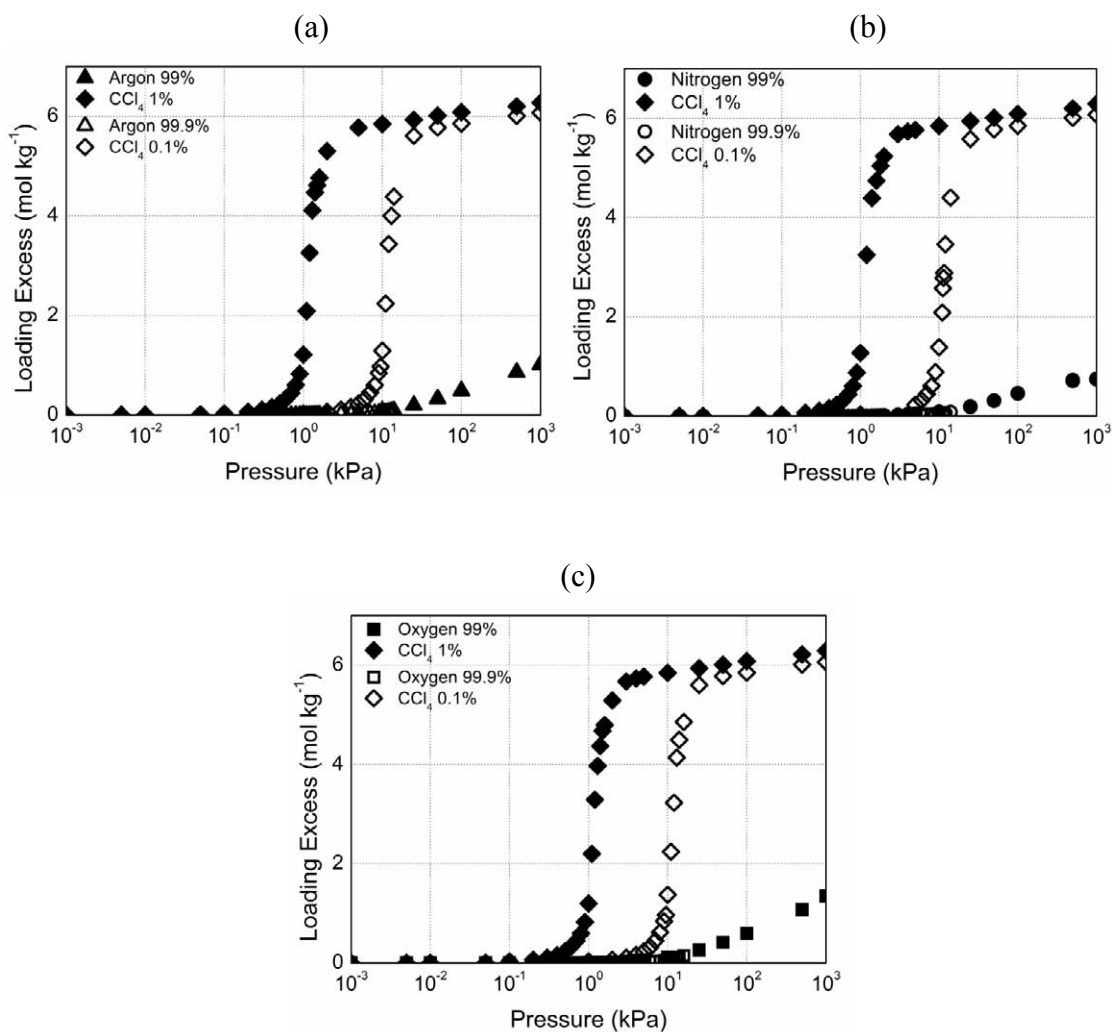

**Figure 1S:** Adsorption isotherms of (a) Ar/CCl<sub>4</sub>, (b) N<sub>2</sub>/CCl<sub>4</sub>, and (c) O<sub>2</sub>/CCl<sub>4</sub> binary mixtures in Cu-BTC. The adsorption isotherms of argon (triangles), nitrogen (circles), oxygen (squares), and carbon tetrachloride (rhombs) were computed at 298 K and at bulk partial fugacity ratio of 99:1 (full symbols) and 99.9:0.1 (empty symbols). Computed error bars are within the symbol size.

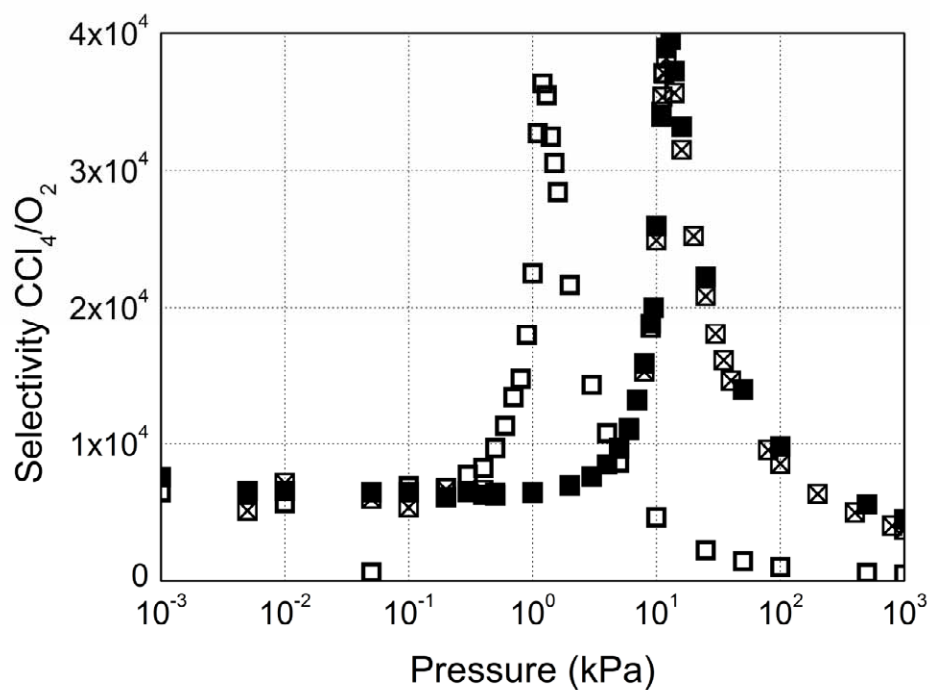

**Figure 2S:** Adsorption selectivity of carbon tetrachloride over oxygen obtained from the computed adsorption isotherms of  $\text{O}_2/\text{CCl}_4$  mixtures at a bulk partial fugacity ratio of 99:1 (empty symbols), 99.9:0.1 (full symbols), and 20.979:0.1 (crossed symbols)

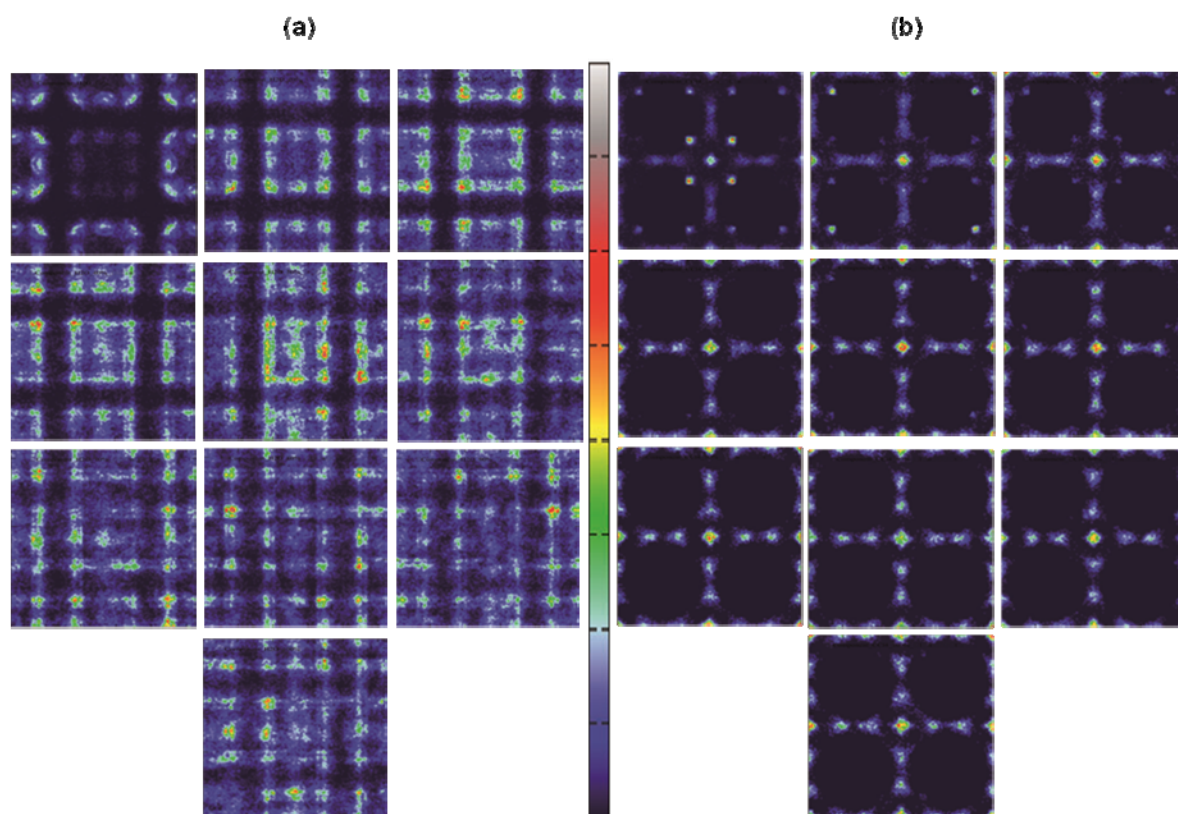

**Figure 3S:** Average occupation profiles of (a) water and (b) carbon tetrachloride in Cu-BTC. The profiles were obtained from the molecular simulations of five-component mixtures of carbon tetrachloride in air with relative humidity from 10%-30% (top left-top right) to 100% (bottom). The same color gradation (from dark blue to white) is employed in all figures, although the total number of molecules present in the unit cell is different for each calculation.

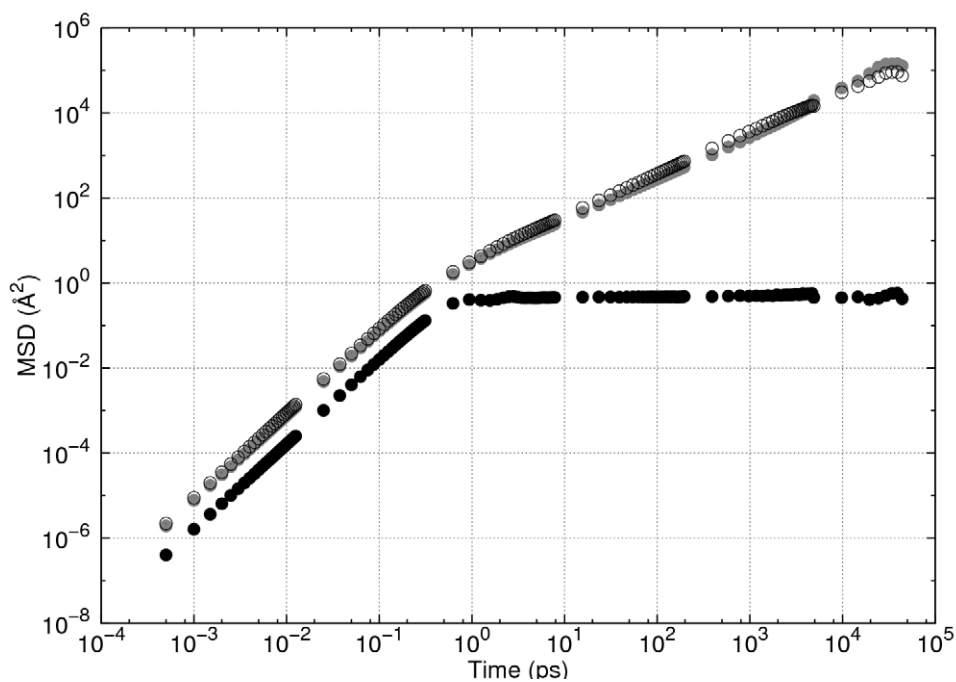

**Figure 4S:** Representation of the Mean Square Displacement (MSD) of oxygen (gray circles), nitrogen (empty circles), and carbon tetrachloride (black circles) as pure components.

- 1 S. Q. Ma and H. C. Zhou, *Chemical Communications*, 2010, **46**, 44-53.
- 2 S. L. Mayo, B. D. Olafson and W. A. Goddard, *Journal of Physical Chemistry*, 1990, **94**, 8897-8909.
- 3 A. K. Rappe, C. J. Casewit, K. S. Colwell, W. A. Goddard and W. M. Skiff, *Journal of the American Chemical Society*, 1992, **114**, 10024-10035.
- 4 D. Farrusseng, C. Daniel, C. Gaudillere, U. Ravon, Y. Schuurman, C. Mirodatos, D. Dubbeldam, H. Frost and R. Q. Snurr, *Langmuir*, 2009, **25**, 7383-7388.
